# Supplementary material
Source: PubMed Central journal article supplement (PMC3001562)
Supplement: psb0506_0695SD1.pdf [file psb0506_0695SD1.pdf]

Supplementary Table 1 ANAC078 target genes having the recognition sequence of ANAC078 in their promoter region.

| AGI Code                                                     | Annotation                                                                         |
|--------------------------------------------------------------|------------------------------------------------------------------------------------|
| <b>METABOLISM</b>                                            |                                                                                    |
| AT1G16410                                                    | CYP79F1 (Cytochrome P450 79F1)                                                     |
| AT1G23205                                                    | invertase/pectin methylesterase inhibitor family protein                           |
| AT1G24090                                                    | RNase H domain-containing protein                                                  |
| AT1G27940                                                    | PGP13 (P-Glycoprotein 13)                                                          |
| AT1G60590                                                    | polygalacturonase, putative / pectinase, putative                                  |
| AT1G78390                                                    | NCED9 (Nine-cis-epoxycarotenoid dioxygenase 9)                                     |
| AT2G32860                                                    | BGLU33 (Beta glucosidase 33)                                                       |
| AT3G02020                                                    | AK3 (Aspartate kinase 3)                                                           |
| AT3G20830                                                    | protein kinase family protein                                                      |
| AT4G23590                                                    | aminotransferase class I and II family protein                                     |
| AT5G10100                                                    | trehalose-6-phosphate phosphatase, putative                                        |
| AT5G10170                                                    | MIPS3 ( <i>Myo</i> -inositol-1-phosphate synthase 3)                               |
| AT5G56350                                                    | pyruvate kinase, putative                                                          |
| AT5G66690                                                    | UGT72E2; UDP-glycosyltransferase/ coniferyl-alcohol glucosyltransferase            |
| <b>CELL RESCUE, DEFENSE AND VIRULENCE</b>                    |                                                                                    |
| AT1G30870                                                    | cationic peroxidase, putative                                                      |
| AT4G36430                                                    | peroxidase, putative                                                               |
| <b>ENERGY</b>                                                |                                                                                    |
| AT3G27690                                                    | LHCB2.3 (Photosystem II light harvesting complex gene 2.3); chlorophyll binding    |
| <b>SPLICING</b>                                              |                                                                                    |
| AT2G29210                                                    | splicing factor PWI domain-containing protein                                      |
| <b>SUBCELLULAR LOCALIZATION</b>                              |                                                                                    |
| AT2G28780                                                    | hypothetical protein                                                               |
| AT2G28790                                                    | osmotin-like protein, putative                                                     |
| <b>PROTEIN WITH BINDING FUNCTION OR COFACTOR REQUIREMENT</b> |                                                                                    |
| AT3G28210                                                    | PMZ; zinc ion binding                                                              |
| AT3G53980                                                    | protease inhibitor/seed storage/lipid transfer protein (LTP) family protein        |
| AT5G10230                                                    | ANN7 (Annexine Arabidopsis 7)                                                      |
| <b>TRANSCRIPTION</b>                                         |                                                                                    |
| AT1G56650                                                    | PAP1 (Production of anthocyanin pigment 1)                                         |
| AT1G62085                                                    | mitochondrial transcription termination factor family protein/mTERF family protein |

|           |                                                        |
|-----------|--------------------------------------------------------|
| AT1G73870 | zinc finger (B-box type) family protein                |
| AT2G47460 | MYB12 (MYB domain protein 12)                          |
| AT3G01600 | ANAC044 (Arabidopsis NAC domain containing protein 44) |
| AT5G58610 | PHD finger transcription factor, putative              |

PROTEIN FATE (folding, modification, destination)

|           |                                                 |
|-----------|-------------------------------------------------|
| AT2G05840 | PAA2 (20S Proteasome subunit PAA2)              |
| AT2G27420 | cysteine proteinase, putative                   |
| AT3G26340 | 20S proteasome beta subunit E, putative         |
| AT3G48340 | cysteine-type peptidase                         |
| AT3G51260 | PAD1 (20s proteasome alpha subunit pad1)        |
| AT4G29040 | RPT2A (regulatory particle triple-A 2A); ATPase |
| AT4G38630 | RPN10 (regulatory particle non-ATPase 10)       |
| AT5G20000 | 26S proteasome AAA-ATPase subunit, putative     |

UNCLASSIFIED PROTEINS

|           |                                                               |
|-----------|---------------------------------------------------------------|
| AT1G10790 | hypothetical protein                                          |
| AT1G23830 | hypothetical protein                                          |
| AT1G49150 | hypothetical protein                                          |
| AT1G70440 | SRO3 (Similar to RCD ONE 3);                                  |
| AT2G20720 | pentatricopeptide (PPR) repeat-containing protein             |
| AT2G41040 | methyltransferase-related                                     |
| AT3G13330 | binding                                                       |
| AT3G13980 | hypothetical protein                                          |
| AT3G26855 | hypothetical protein                                          |
| AT3G54500 | hypothetical protein                                          |
| AT3G58940 | F-box family protein                                          |
| AT3G59900 | ARGOS (Auxin-regulated regulated gene involved in organ size) |
| AT4G15390 | transferase family protein                                    |
| AT5G05190 | hypothetical protein                                          |
| AT5G40800 | hypothetical protein                                          |

---
